# Supplementary material for: MiR-486-5p negatively regulates oncogenic NEK2 in hepatocellular carcinoma
Source: PubMed Central journal article supplement (PMC5581084; doi:10.18632/oncotarget.17635), 2017-05-05
Supplement: oncotarget-08-52948-s001.pdf [file oncotarget-08-52948-s001.pdf]

# MiR-486-5p negatively regulates oncogenic NEK2 in hepatocellular carcinoma

## SUPPLEMENTARY MATERIALS

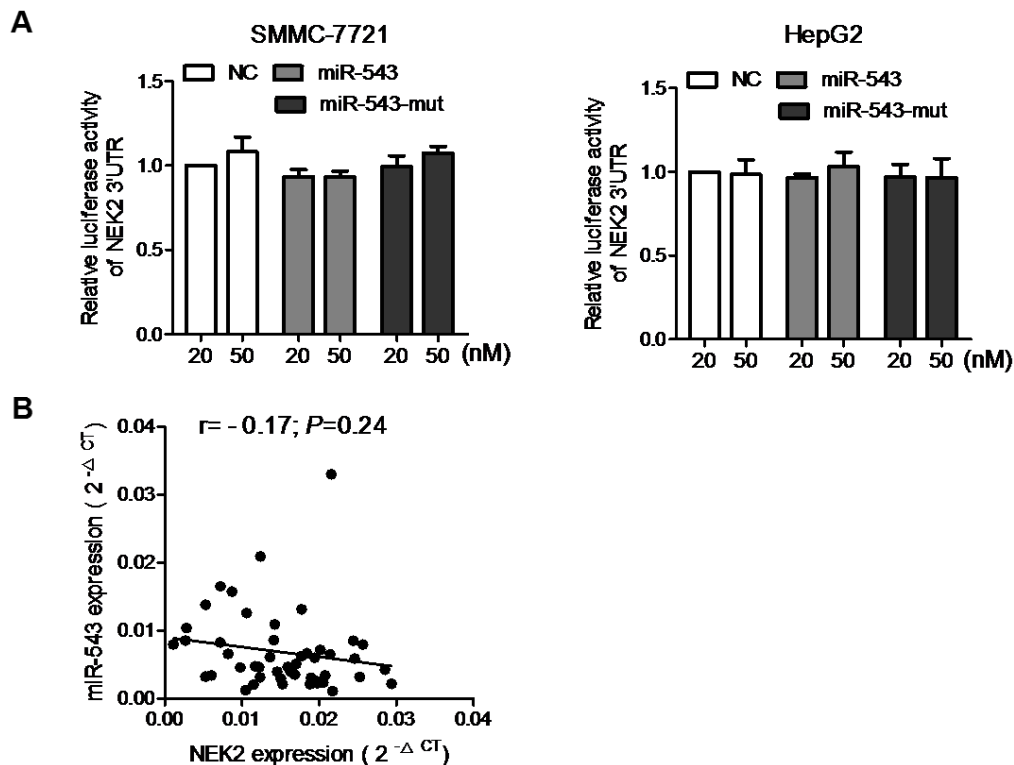

**Supplementary Figure 1:** (A) Analysis of luciferase activity from reporter constructs containing the 3'UTR end of NEK2 in HCC cells transfected with the miR-543 mimic, miR-543 mutation mimic (miR-543-mut) and negative control (NC). (B) Correlation analysis of miR-543 expression with NEK2 mRNA expression in HCC patient samples (n=48).

**Supplementary Table 1: Clinicopathological characteristics of 48 HCC patients**

See Supplementary File 1

**Supplementary Table 2: Influence of clinicopathological characteristics on patients' prognosis**

See Supplementary File 1
